# Supplementary material for: Light-driven Proton Pumps as a Potential Regulator for Carbon Fixation in Marine Diatoms
Source: PubMed Central journal article supplement (PMC10308239; doi:10.1264/jsme2.me23015), 2023-06-20
Supplement: 38_23015_s1.pdf [file 38_23015_s1.pdf]

## Supporting Information

# Light-driven proton pumps as a potential regulator for carbon fixation in marine diatoms

Susumu Yoshizawa\*, Tomonori Azuma, Keiichi Kojima, Keisuke Inomura, Masumi Hasegawa, Yosuke Nishimura, Masuzu Kikuchi, Gabrielle Armin, Yuya Tsukamoto, Hideaki Miyashita, Kentaro Ifuku, Takashi Yamano, Adrian Marchetti, Hideya Fukuzawa, Yuki Sudo and Ryoma Kamikawa

\*Susumu Yoshizawa

**Email:** [yoshizawa@aori.u-tokyo.ac.jp](mailto:yoshizawa@aori.u-tokyo.ac.jp)

### **This file includes**

|                                      |         |
|--------------------------------------|---------|
| Supplementary Results and Discussion | p. 2    |
| Extended Data Figs. 1–8              | p. 3–10 |
| Supplementary Tables S1–S2           | p. 11   |
| Supplementary References             | p. 12   |

## Supplementary Results and Discussion

### Photocycle of PngR

To analyze the photocycle of PngR, we performed flash-photolysis experiment. Extended Data Fig. 5A shows the flash-induced difference spectra over the spectral range of 380–700 nm. The depletion and recovery of absorbance at  $\sim 510$  nm correspond to the bleaching of the original state, while an increase and decrease of absorbance at  $\sim 410$  and  $570$  nm were characteristically observed. Extended Data Fig. 5B shows the time courses of the difference absorbance changes at the three wavelengths of 410, 510 and 570 nm. Following the illumination, an absorption increase at  $\sim 570$  nm was observed together with the depletion of the original state. An absorption increase at  $\sim 410$  nm was then observed with a concomitant absorption decrease at  $\sim 570$  nm within 0.5 ms. Considering the temporal and spectral ranges of the absorption changes, the absorbances at 570 and 410 nm were tentatively attributed to the K- and M-intermediates, respectively. The absorbance at  $\sim 410$  nm decreased with the concomitant absorbance increase at  $\sim 570$  nm, which was tentatively assigned as the O-intermediate, within 10 ms. Finally, the absorbance at  $\sim 570$  nm was depleted with recovery of the original state within 300 ms. Thus, after the light absorption, PngR sequentially forms K-, M- and O-intermediates, and then returns to the original state. To estimate the decay time constants of the intermediates, the temporal absorption changes at 410, 510 and 570 nm were fitted with a triple-exponential function assuming the irreversible sequential model. The decay time constants of the K-, M- and O-intermediates were estimated as 0.061, 0.83 and 61 ms, respectively. Finally, we investigated how proton uptake and release happen during the photocycle since PngR exhibits a proton pumping function.

Proton uptake and release by PngR during the photocycle were detected as the time course of the absorbance changes at 450 nm by using pyranine, a pH-sensitive dye. Pyranine works as a pH indicator, and the absorbance of pyranine at 450 nm was decreased under acidic conditions. As a result, the absorbance of pyranine increased within 5 ms and then decreased within 100 ms (Extended Data Fig. 5B), which indicates that the substrate proton was first taken up from the bulk solution and then released from PngR during photocycle. These absorbance changes were observed coincident with those of O-intermediate, which suggests that proton uptake and release are coincident with the formation and decay of O-intermediate, respectively. Based on these results, we propose a photocycle model of PngR as shown schematically in Extended Data Fig. 5C.

## Extended Data Figs.

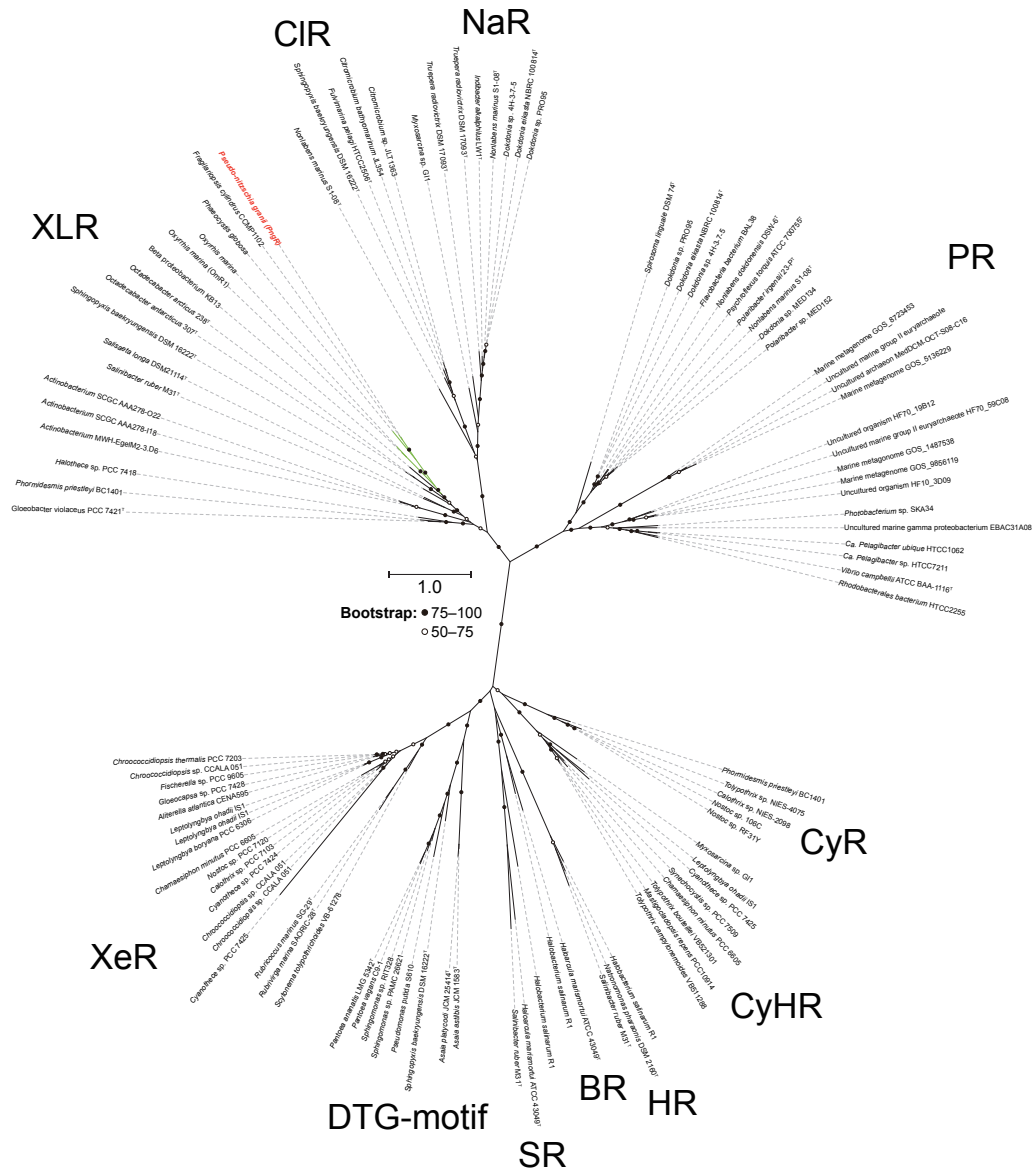

**Extended Data Fig. 1. Phylogenetic position of diatom rhodopsin and the rhodopsin sequences used in this analysis.** A maximum likelihood tree of amino acid sequences of microbial rhodopsins. Diatom rhodopsin (PngR) is indicated by red character and bootstrap probabilities ( $\geq 50\%$ ) are indicated by black and white circles. Green branches indicate eukaryotic rhodopsins used in this analysis, and black branches indicate prokaryotic rhodopsins. Rhodopsin clades are as follows: XLR (Xanthorhodopsin-like rhodopsin), CIR (Cl<sup>-</sup>-pumping rhodopsin), NaR (Na<sup>+</sup>-pumping rhodopsin), PR (proteorhodopsin), XeR (xenorhodopsin), DTG-motif rhodopsin, SR (sensory rhodopsin-I and sensory rhodopsin-II), BR (bacteriorhodopsin), HR (halorhodopsin), CyHR (cyanobacterial halorhodopsin), and CyR (cyanorhodopsin).

|      |                           |                           |            |                            |            |                            |                                   |
|------|---------------------------|---------------------------|------------|----------------------------|------------|----------------------------|-----------------------------------|
| PngR | -----                     | -----                     | -----      | --MVTANQFT                 | IVYD--VLSF | SLATMMATTI                 | FLWMRVPSVH                        |
| XR   | --MLQEL---                | -----                     | -----      | -PTLTPGQYS                 | LVFN--MFSF | TVATMTASFV                 | FFVLRANNVA                        |
| GR   | M-LMTVFSSA                | PELALLGSTF                | AQVDPSNLSV | SDSLTYGQFN                 | LVYN--AFSF | AIAAMFASAL                 | FFFSQAQLVG                        |
| BR   | --MLELLPTA                | V-----                    | -----      | -EGVSQAQIT                 | GRPEWIWLAL | GTALMGLGTL                 | YFLVKGMGVS                        |
| PR   | MKLLLLILGSV               | IALPTFAAGG                | -----      | -GDLDASDYT                 | GV----SFWL | VTAALLASTV                 | FFFVERDRVS                        |
| NaR  | --MTQELGNA                | NFENFIGAT-                | -----      | -EGFSEIAYQ                 | FTSH--ILTL | GYAVMLAGLL                 | YFILTICKVD                        |
|      |                           |                           |            |                            |            |                            | 85 89<br>(91) (95)                |
| PngR | -EKYKSALII                | SGLVTFIAAY                | HYLRIFNSWT | EAYEWTAE-G                 | E--LSATASP | FNDAY--RYM                 | <b>DWLLT</b> VP <sup>85</sup> LLL |
| XR   | -PKYRISMMV                | SALVVFIAGY                | HYFRITSSWE | AAYA-LQN-G                 | M--YQPTGEL | FNDAY--RYV                 | <b>DWLLT</b> VP <sup>89</sup> LLT |
| GR   | -QRYRLALLV                | SAIVVSIAGY                | HYFRIFNSWD | AAYV-LEN-G                 | V--YSLTSEK | FNDAY--RYV                 | <b>DWLLT</b> VP <sup>85</sup> LLL |
| BR   | DPDAKKFYAI                | TTLVPAIAFT                | MYLSMLLGYG | LT-----                    | ---MVPFGGE | QNPIYWARYA                 | <b>DWLF</b> TTP <sup>85</sup> LLL |
| PR   | -AKWKTSLTV                | SGLVTGIAFW                | HYMYMRGVWI | ET-----                    | -----GD    | SPTVF--RYI                 | <b>DWLLT</b> VP <sup>85</sup> LLI |
| NaR  | -KKFQMSNIL                | SAVVMVSAFL                | LLYAQAQNT  | SSFTFNEEVG                 | RYFLDPSGDL | FNNGY--RYL                 | <b>NWLI</b> DVP <sup>85</sup> MLL |
|      |                           |                           |            |                            |            |                            | 96<br>(102)                       |
| PngR | <b>I</b> EIILVMKLP        | ADESRSKATT                | LGIASAAMIA | IGYPGELAMS                 | DDSLGTRWVY | WIGAMLPFLY                 | IVQ <sup>96</sup> TLLVGLN         |
| XR   | <b>V</b> ELVLVMGLP        | KNERGPLAAK                | LGFLAALMIV | LGYPGEVSEN                 | AALFGTRGLW | GFLSTIPFVW                 | ILYILFTQLG                        |
| GR   | <b>V</b> ETVAVLTLP        | AKEARPLLIK                | LTVASVLMIA | TGYPGEISDD                 | IT---TRIIW | GTVSTIPFAY                 | ILYVLWVELS                        |
| BR   | <b>L</b> DLALLV---        | -DADQGTILA                | LVGADGIMIG | TGLV <sup>96</sup> GALTKV  | YS---YRFVW | WAISTAAMLY                 | ILYVLF <sup>96</sup> FGFT         |
| PR   | <b>C</b> EYLLILAAA        | TNVAGSLFKK                | LLVGSLVMLV | FGYMGEAGIM                 | AA-----WPA | FIIGCLAWVY                 | MIYELWAGEG                        |
| NaR  | <b>F</b> QILFVVSLT        | TSKFSSVRNQ                | FWFSGAMMII | TGYIGQFYEV                 | SNLT-AFLVW | GAISSAFFFH                 | ILWWMKKVIN                        |
|      |                           |                           |            |                            |            |                            | 212 216<br>(227) (231)            |
| PngR | DATQSEADPA                | IRDLIKGVQW                | WTVISWCTYP | VVYVFPMM-G                 | ITG-----TN | AIVGIIQ---L                | GYSVSD <b>I</b> IISK              |
| XR   | DTIQRQS-SR                | VSTLLGNARL                | LLLATWGFYP | IAYMIPMA-F                 | PEAFPSNTPG | TIVALQ---V                 | GYTIAD <b>V</b> LAK               |
| GR   | RSLVRQP-AA                | VQTLVRNMRW                | LLLLSWGVPY | IAYLLPML-G                 | VSG-----TS | AAVG <sup>212</sup> VQ---V | GYTIAD <b>V</b> LAK               |
| BR   | SKAESMR-PE                | VASTFKVLRN                | VTVVLWSAYP | VVWLIGS---                 | -EG-----A  | GIVPLNIETL                 | LFMVL <b>D</b> VSAK               |
| PR   | KSACNTASPA                | VQSAYNTMMY                | IIIFGWAIYP | VGYFTGYL-M                 | GDG-----G  | SALNLN---L                 | IYNLAD <b>F</b> VNK               |
| NaR  | EGKEGIS-PA                | GQKILSNIWI                | LFLISWTLYP | GAYLMPYL <sup>212</sup> TG | VDGFLYS-ED | GVMARQ---L                 | VYTIAD <b>V</b> SSK               |
|      |                           |                           |            |                            |            |                            |                                   |
| PngR | CGVGLMIYQI                | TIAKSYAL--                | --KKGNEETP | LYG-----                   | -----      |                            |                                   |
| XR   | AGYGVLIYNI                | AKAKSEEEGF                | NVSEMVEPAT | ASA-----                   | -----      |                            |                                   |
| GR   | PVFGLLVF <sup>96</sup> AI | ALVKT <sup>96</sup> KAD-- | --QESSEPHA | AIGAAANKSG                 | GSLIS      |                            |                                   |
| BR   | VGFGLLILL--               | ---RSRAI-F                | GEAEAPEPSA | GDGAAATSD-                 | -----      |                            |                                   |
| PR   | ILFGLIIWNV                | AVKESSNA--                | -----      | -----                      | -----      |                            |                                   |
| NaR  | VIYGVLLGNL                | AITLSKNKEL                | --VEANS--- | -----                      | -----      |                            |                                   |

**Extended Data Fig. 2. Sequence alignment of rhodopsins.** The accessions and rhodopsin families are as follows: PngR (AJA37445.1, XLR), XR (WP\_011404249.1, XLR), GR (BAC88139.1, XLR), BR (CAP14056.1, BR), PR (AAG10475.1, PR), and NaR (BAN14808.1, NaR). All rhodopsins except NaR function as proton pump. Columns of functionally important residues are shown in bold. The numbers above the columns indicate amino acid numbers in BR, and PngR in parentheses. Known functions are as follows: primary proton acceptor (Asp85 in BR), proton donor (Glu96), counterion (Asp212), Schiff base (Lys216). Two carboxylates, Asp (D) and Glu (E), are shown in blue, and Schiff base Lys (K) is shown in red.

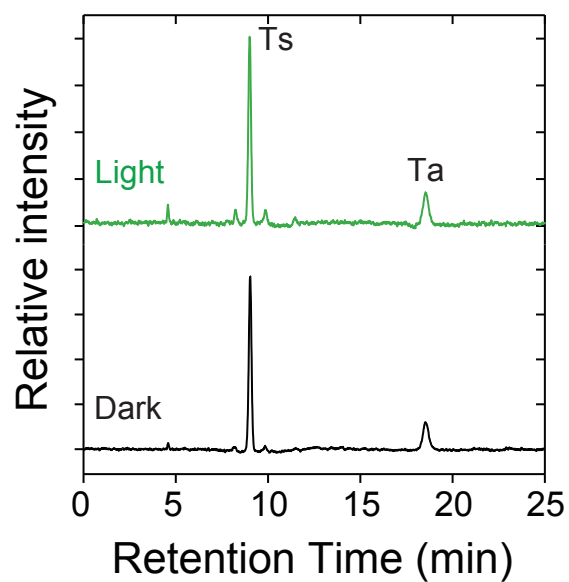

**Extended Data Fig. 3. Retinal configuration of PngR.** HPLC patterns of retinal isomers of PngR with (green line) and without (black line). Ts and Ta represent all-*trans*-15-*syn* and all-*trans*-15-*anti* retinal oximes, respectively.

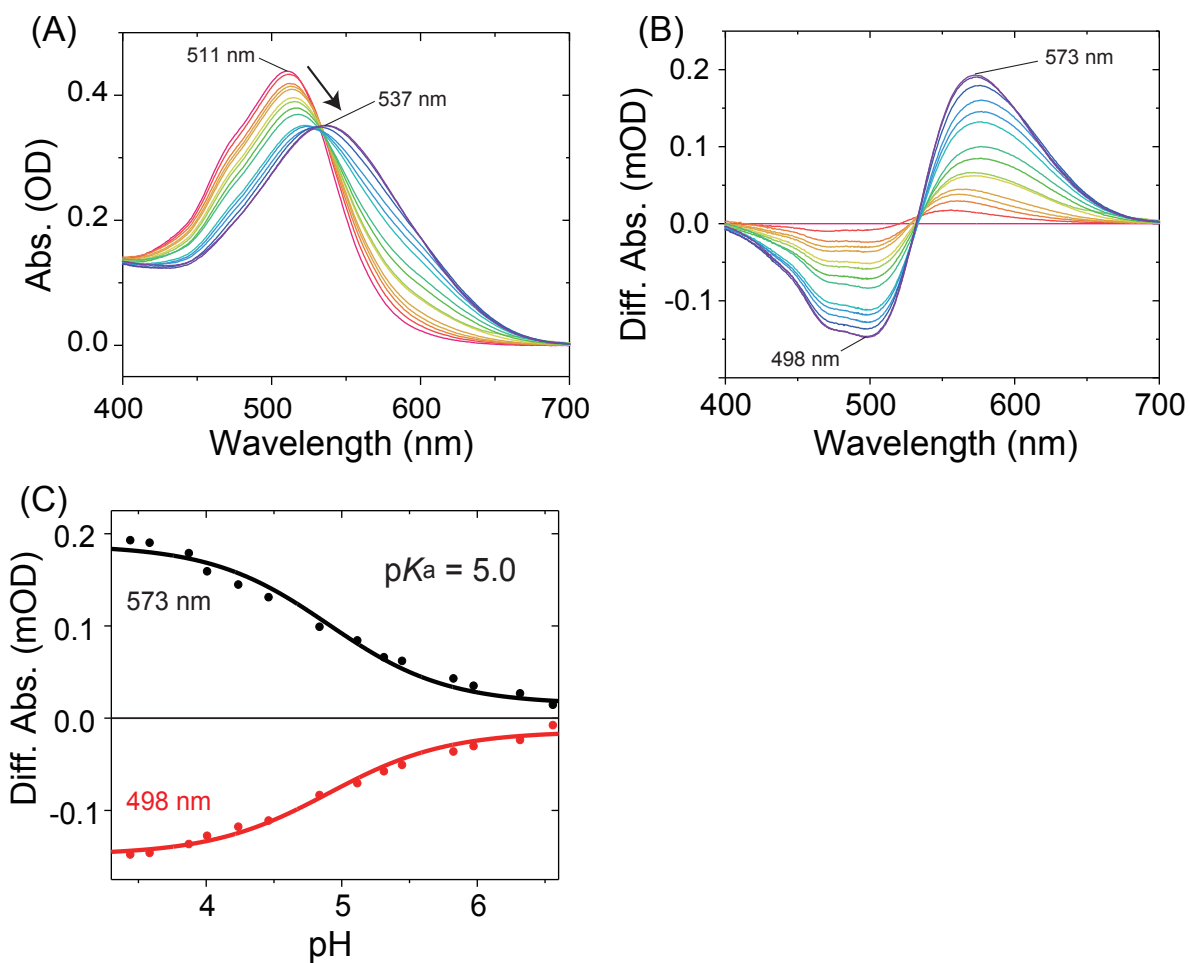

**Extended Data Fig. 4. pH-induced spectral changes of PngR.** (A) Absorption spectra of PngR at acidic pH from 7.0 to 3.4 in Buffer A containing 50 mM Tris-HCl, 1 M NaCl and 0.05% (w/v) DDM. (B) Difference absorption spectra; each spectrum was obtained by subtracting the spectrum at pH 7.0. (C) Plots of the difference absorbance at 498 and 573 nm against the pH values. The titration curve was analyzed using the Henderson-Hasselbalch equation assuming single  $pK_a$  value (solid lines).

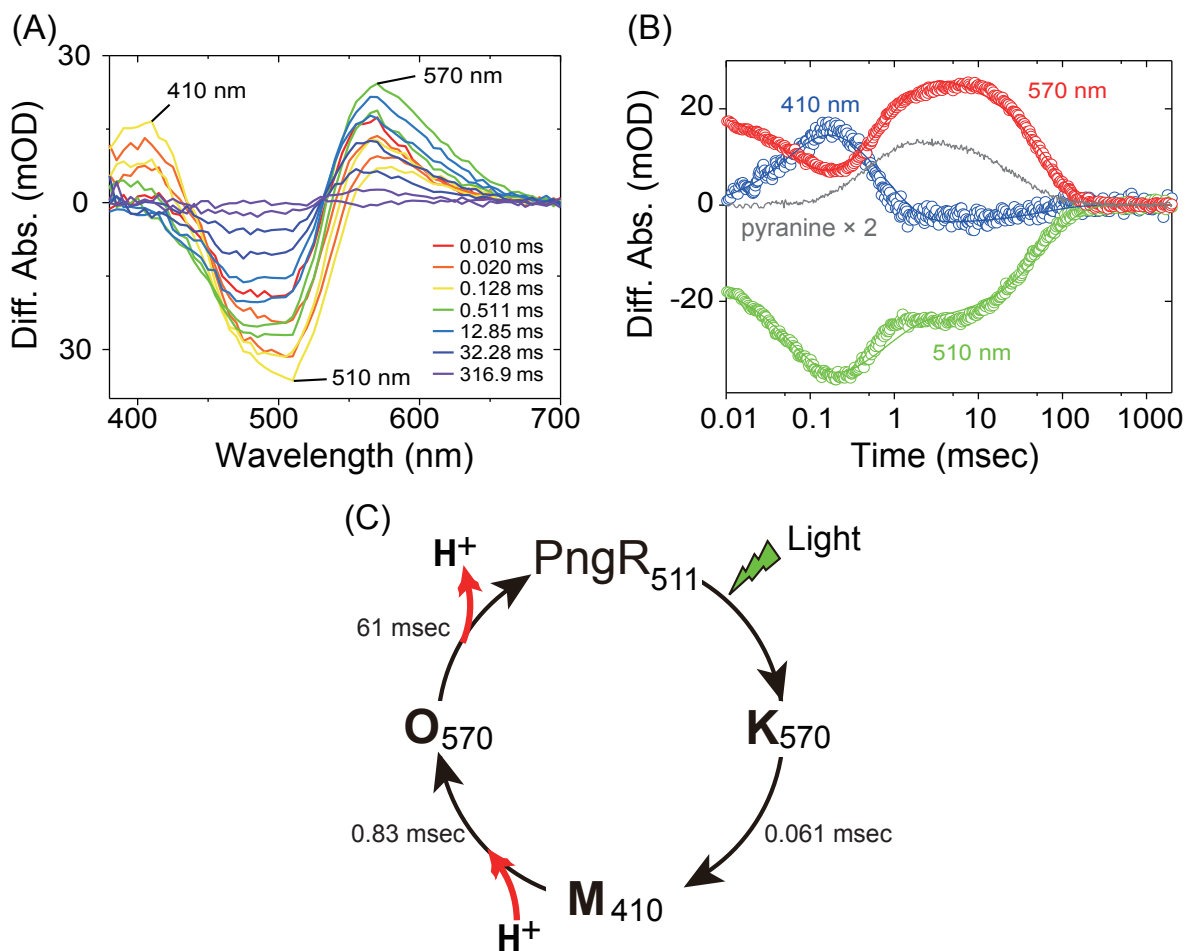

**Extended Data Fig. 5. Photoreaction kinetics of PngR with timing of proton release and uptake.** (A) Flash-induced difference absorption spectra over the spectral range of 380 to 700 nm in Buffer A containing 50 mM Tris-HCl (pH 7.0), 1 M NaCl and 0.05% (w/v) DDM. (B) Time courses of absorbance changes at 410, 510, and 570 nm. The black solid lines indicate the fitting curves. The absorption changes of pyranine monitored at 450 nm were enlarged 2 times and are shown as a gray solid line. (C) Proposed photo cycle model of PngR with the timing of the proton release and uptake.

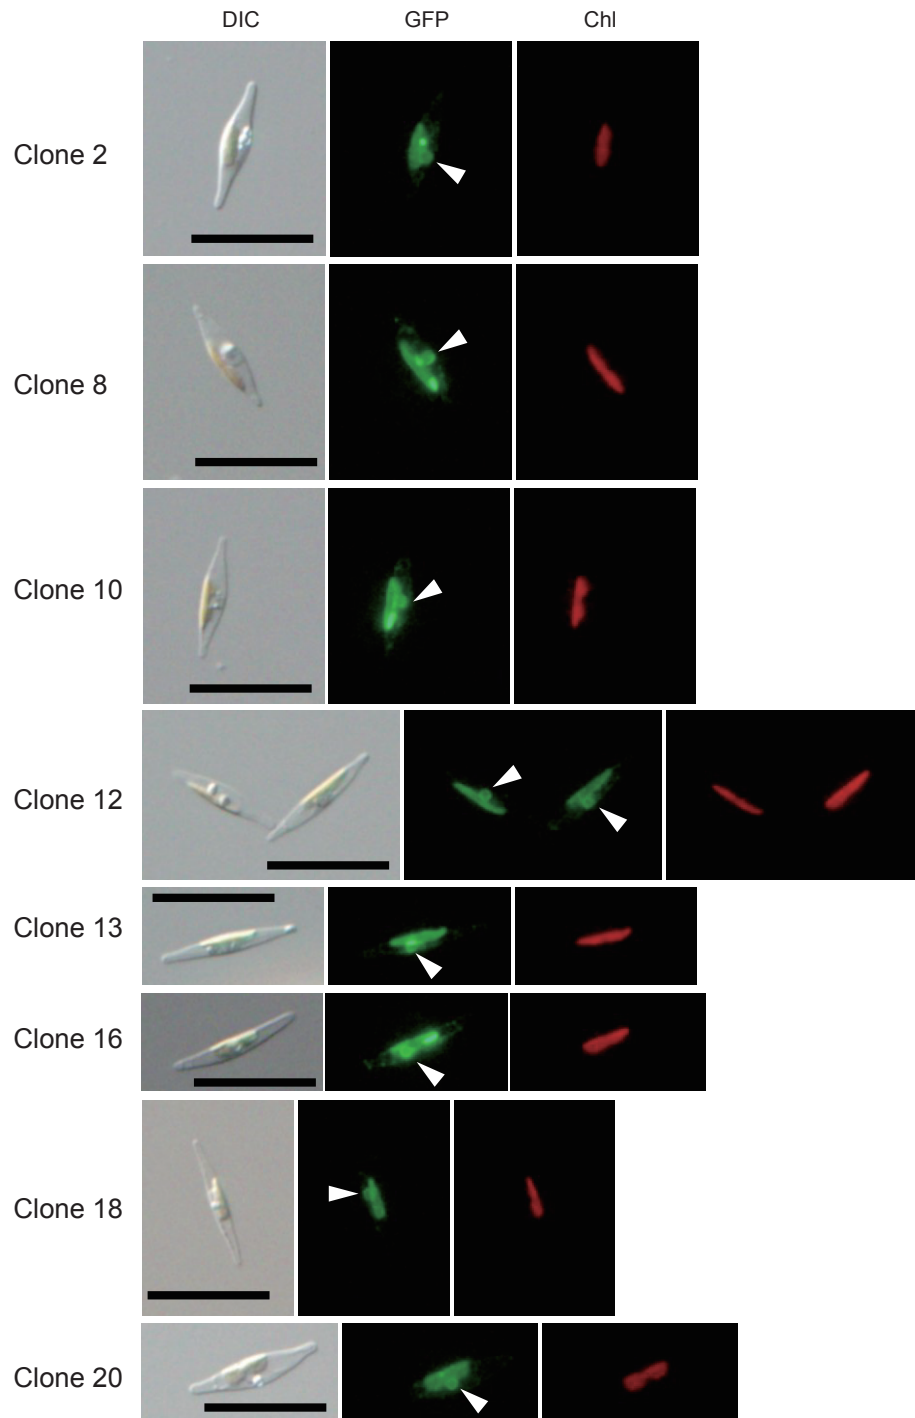

**Extended Data Fig. 6. Subcellular localization of the exogenously introduced PngR and plastid in diatom cells.** Transformed diatom cells were observed with DIC (Differential Interface Contrast) (Left). Green fluorescence from the recombinant protein (GFP) and the chlorophyll autofluorescence (Chl) are shown in center and right, respectively. The triangles show the location of nucleus, and GFP surrounds the nucleus. Scale bar indicates 20  $\mu\text{m}$ .



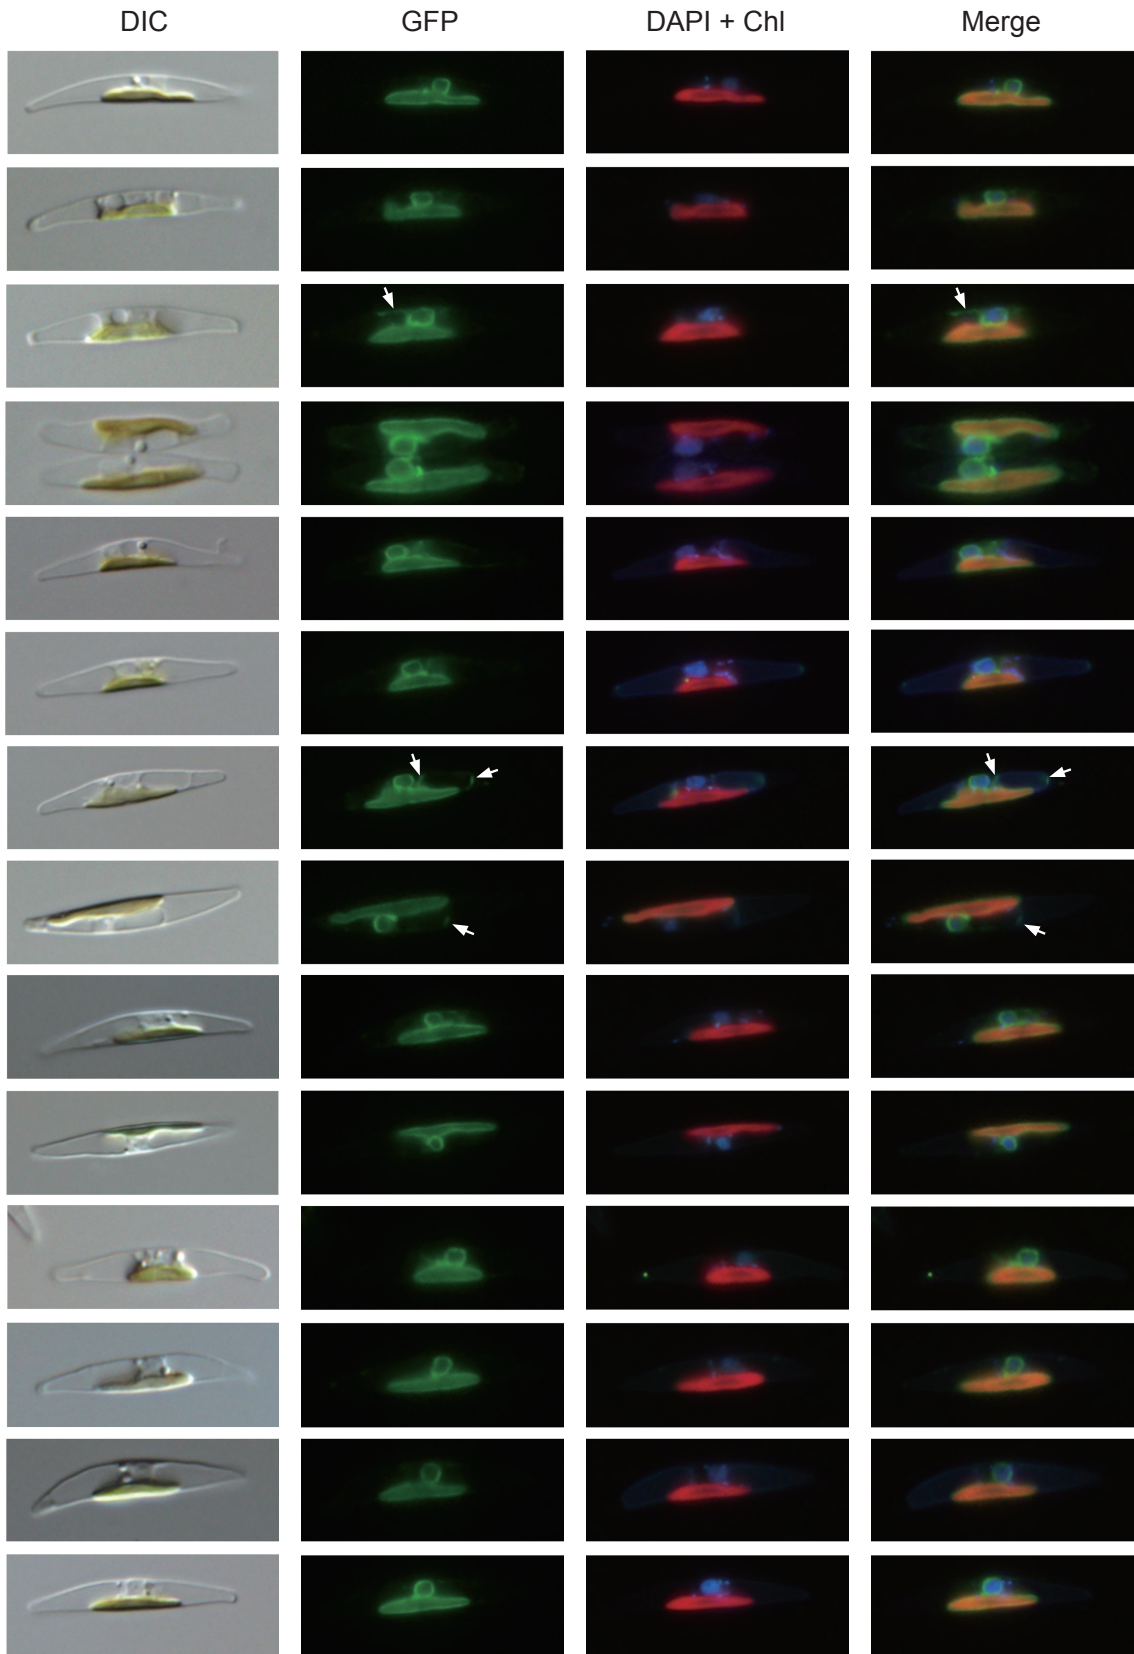

**Extended Data Fig. 7. Subcellular localization of the exogenously introduced PngR, nucleus and plastid in diatom cells.** Transformed diatom cells were observed with DIC (Differential Interface Contrast) (Left). Green fluorescence from the recombinant protein (GFP) (Left center). The nuclear DNA stained with DAPI and the chlorophyll autofluorescence (DAPI + Chl) and merged image (Merge) are shown in right center and right, respectively. Arrows indicate GFP fluorescence outside the chloroplast; most of the GFP fluorescence is localized to the CERM, but it may also be observed in other organelles (e.g., vacuoles and periplasmic membranes).

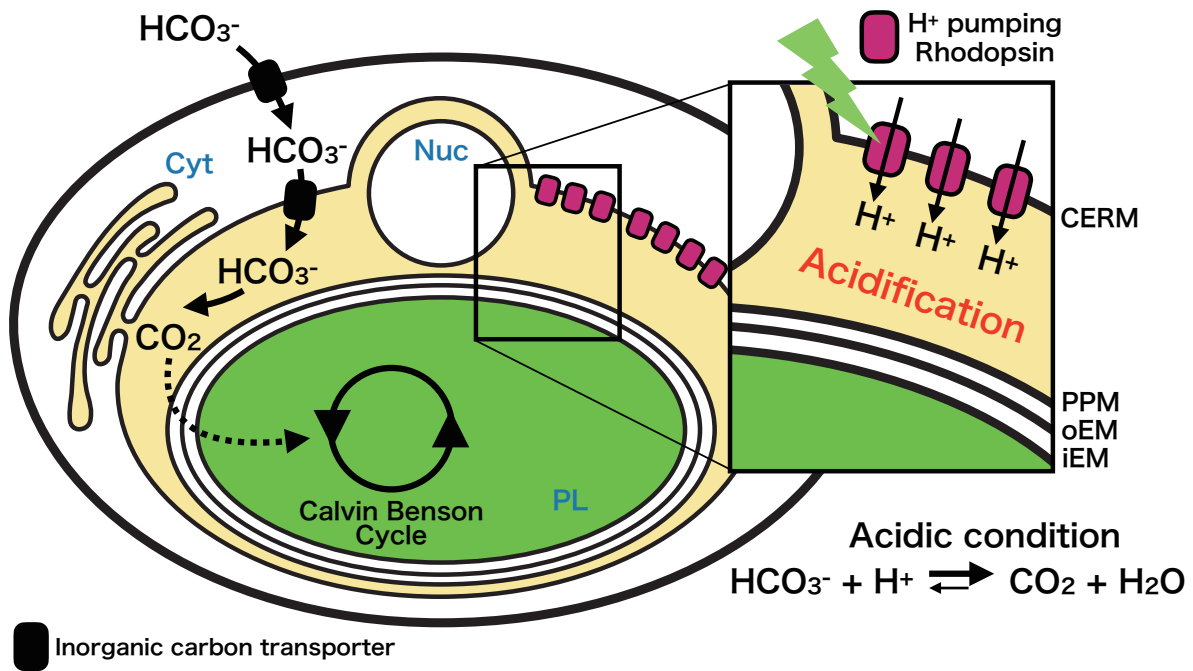

**Extended Data Fig. 8. A proposed model that proton transport by rhodopsin is involved in CCM.** The proton transport of rhodopsin acidifies the region (the middle space) surrounded by the membrane of CERM and PPM. Abbreviation are as follows: Cyt (Cytosol), Nuc (Nucleus), PL (Plastid), CERM (Chloroplast endoplasmic reticulum membrane), PPM (Periplastidial membrane), oEM (Outer plastid envelope membrane) and iEM (Internal plastid envelope membrane).

## Supplementary Tables

Table S1 Parameters, units and definitions. Parameters are listed roughly in the order of appearance.

| Parameter  | Unit                                 | Definition                                        |
|------------|--------------------------------------|---------------------------------------------------|
| $[CO_2]_p$ | $\mu\text{mol L}^{-1}$               | CO <sub>2</sub> concentration in the plastid      |
| $t$        | d                                    | time                                              |
| $D$        | $\text{d}^{-1}$                      | diffusion coefficient                             |
| $[CO_2]_m$ | $\mu\text{mol L}^{-1}$               | CO <sub>2</sub> concentration in the middle space |
| $V_{max}$  | $\mu\text{mol L}^{-1} \text{d}^{-1}$ | maximum C fixation rate                           |
| $K$        | $\mu\text{mol L}^{-1}$               | Half-saturation constant for C fixation           |
| $V_{Cfix}$ | $\mu\text{mol L}^{-1} \text{d}^{-1}$ | C fixation rate                                   |
| $[DIC]_m$  | $\mu\text{mol L}^{-1}$               | DIC concentration in the middle space             |
| $[H^+]_m$  | $\text{mol kg}^{-1}$                 | H <sup>+</sup> concentration in the middle space  |
| $K_1$      | $\text{mol kg}^{-1}$                 | temperature and salinity dependent constant 1     |
| $K_2$      | $\text{mol kg}^{-1}$                 | temperature and salinity dependent constant 2     |
| $T$        | K                                    | temperature                                       |
| $S$        | ‰                                    | salinity                                          |

Table S2 Parameter values

| Parameter | Value                | Unit                   |
|-----------|----------------------|------------------------|
| $K$       | 44 <sup>*1</sup>     | $\mu\text{mol L}^{-1}$ |
| $[DIC]_m$ | 993 <sup>*2</sup>    | $\mu\text{mol L}^{-1}$ |
| $T$       | 298.15 <sup>*3</sup> | K                      |
| $S$       | 35 <sup>*4</sup>     | ‰                      |

\*1 Based on the middle value from (Young *et al.*, 2016, Jensen *et al.*, 2020)

\*2 Observed value of DIC in a diatom *Phaeodactylum tricornutum* (Burns and Beardall, 1987). This is the only mean value we found for diatoms.

\*3 Typical room temperature.

\*4 Typical values of seawater (note that  $K_1$  and  $K_2$  values are relatively insensitive to  $S$  values).

## Supplementary References

- Burns, B.D., and Beardall, J. (1987) Utilization of Inorganic Carbon by Marine Microalgae. *J Exp Mar Bio Ecol* **107**: 75-86.
- Young, J.N., Heures, A.M.C., Sharwood, R.E., Rickaby, R.E.M., Morel, F.M.M., and Whitney, S.M. (2016) Large variation in the Rubisco kinetics of diatoms reveals diversity among their carbon-concentrating mechanisms. *J Exp Bot* **67**: 3445-3456.
- Jensen, E.L., Maberly, S.C., and Gontero, B. (2020) Insights on the functions and ecophysiological relevance of the diverse carbonic anhydrases in microalgae. *Int J Mol Sci* **21**: 2922.
